# Supplementary material for: Associations between lower limb eccentric muscle capability and change of direction speed in basketball and tennis players
Source: PeerJ. 2022 May 23;10:e13439. doi: 10.7717/peerj.13439 (PMC9135034; doi:10.7717/peerj.13439)
Supplement: Supplemental Information 1 [file peerj-10-13439-s001.xlsx]

## Sheet: Sheet1
Code	Age	Gender	BodyHeight	BodyMass	Dom_Arm	Dom_Leg	Nordic_MVC_both	B05_ECC_MAX_both	B125_ECC_MAX_both	B2_ECC_MAX_both	Identifier	Identifier2	CMJ_Dec_Phase_FI	CMJ_F_PeakECC_stand	CMJ_F_PeakECC_P3	CMJ_Max_ECC_RFD_Stand	Agility_general	Agility90	Agility180	filter_$	Training_years	Weekly_sess
T_BAS_001	15.57	1	183.0	66.3	R	L	282.82	33.76	38.78	42.67	Basketball	1	106.10	26.23	23.69	20338.00	10.67	2.39	2.95	1	5.00	7.00
T_BAS_002	15.57	1	183.0	77.3	R	L	346.70	24.02	23.20	27.77	Basketball	1	106.00	24.47	18.99	15021.00	10.29	2.32	2.83	1	6.00	10.00
T_BAS_003	16.71	1	190.0	77.1	R	L	308.26	21.80	21.89	23.24	Basketball	1	97.16	22.69	21.28	10568.00	10.17	2.34	2.75	1	5.00	12.00
T_BAS_004	16.54	1	186.0	88.4	R	L	329.99	21.85	21.76	24.24	Basketball	1	106.80	22.08	22.12	13243.00	10.55	2.38	2.90	1	7.00	6.00
T_BAS_005	16.02	1	182.0	84.8	L	R	252.63	19.37	19.01	21.54	Basketball	1	115.10	23.33	20.63	12868.00	11.43	2.55	3.17	1	5.00	7.00
T_BAS_006	15.19	1	194.0	76.2	R	L	321.07	26.96	26.13	31.11	Basketball	1	117.10	24.31	21.15	15148.00	10.47	2.34	2.90	1	7.00	10.00
T_BAS_007	16.54	1	183.0	66.1	R	L	302.45	22.54	28.74	29.71	Basketball	1	89.01	23.74	10.18	10428.00	10.40	2.35	2.85	1	5.00	6.00
T_BAS_010	15.71	1	190.0	93.2	R	L	224.31	22.71	19.77	20.14	Basketball	1	131.30	22.83	14.94	40242.00	11.16	2.52	3.07	1	4.00	13.00
T_BAS_014	17.01	1	189.0	70.5	R	L	266.91	24.27	23.50	34.36	Basketball	1	100.40	26.88	19.61	16293.00	10.25	2.27	2.86	1	4.00	13.00
T_BAS_015	15.83	1	196.5	76.8	R	L	337.08	26.20	26.11	29.73	Basketball	1	102.20	21.87	20.81	15661.00	10.73	2.38	2.99	1	7.00	9.00
T_BAS_017	14.62	1	190.0	78.0	R	L	341.43	15.23	22.06	26.66	Basketball	1	119.70	25.06	9.98	19090.00	10.31	2.34	2.82	1	7.00	6.00
T_BAS_018	16.20	1	194.0	78.4	R	L	293.76	22.75	23.88	23.84	Basketball	1	113.00	21.87	22.04	9788.00	10.88	2.53	2.91	1	7.00	7.00
T_BAS_020	15.53	1	190.0	87.3	R	L	364.71	20.70	20.22	21.83	Basketball	1	120.80	25.12	17.72	26989.00	11.11	2.54	3.02	1	5.00	10.00
T_BAS_021	16.67	1	192.0	73.4	R	L	272.84	26.08	28.44	31.68	Basketball	1	112.70	24.07	9.86	23606.00	10.62	2.49	2.83	1	7.00	7.00
T_BAS_022	16.13	1	191.0	76.6	R	L	307.95	25.74	28.86	32.70	Basketball	1	111.60	23.10	20.10	34149.00	10.74	2.38	2.99	1	5.00	5.00
T_BAS_024	15.27	1	180.0	72.7	R	L	316.68	24.50	26.36	27.69	Basketball	1	102.70	25.16	15.70	41744.00	10.43	2.34	2.87	1	7.00	10.00
T_BAS_026	15.71	1	199.0	89.8	R	L	408.13	19.86	22.79	24.09	Basketball	1	118.50	22.80	22.08	11465.00	10.38	2.43	2.77	1	9.00	10.00
T_BAS_027	16.91	1	198.0	79.8	R	L	264.93	21.72	24.37	25.47	Basketball	1	118.80	25.06	19.03	18915.00	10.35	2.37	2.81	1	6.00	8.00
T_BAS_028	17.71	1	185.0	76.5	R	L	275.54	24.98	25.36	32.12	Basketball	1	103.60	27.40	11.92	15944.00	10.67	2.45	2.89	1	5.00	10.00
T_BAS_029	16.99	1	197.0	81.5	R	L	330.21	21.20	24.22	26.70	Basketball	1	101.30	23.86	9.85	15212.00	11.07	2.56	2.97	1	5.00	14.00
T_BAS_032	17.49	1	190.0	85.1	L	R	335.05	18.34	20.30	21.38	Basketball	1	103.30	25.38	17.71	19244.00	10.90	2.42	3.03	1	5.00	13.00
T_BAS_036	16.19	1	182.0	65.3	R	L	259.43	19.23	20.40	22.41	Basketball	1	90.14	26.37	20.52	20919.00	10.77	2.47	2.92	1	4.00	12.00
T_BAS_038	17.72	1	183.0	74.0	R	L	310.95	25.91	25.44	28.63	Basketball	1	100.60	27.50	21.24	23052.00	10.26	2.27	2.86	1	5.00	12.00
T_BAS_048	17.24	1	195.0	92.7	R	L	396.07	23.18	27.35	31.58	Basketball	1	154.20	26.07	17.16	26844.00	10.84	2.45	2.97	1	7.00	6.00
T_BAS_049	17.39	1	192.5	89.9	R	L	444.09	23.96	29.92	33.94	Basketball	1	141.60	27.63	9.90	28190.00	10.61	2.37	2.94	1	7.00	7.00
T_BAS_050	15.99	1	205.0	76.4	L	R	291.44	22.34	26.15	27.51	Basketball	1	92.45	22.74	9.96	22178.00	11.25	2.50	3.13	1	4.00	6.00
T_BAS_051	16.42	1	179.0	60.1	R	L	196.99	24.80	27.10	31.37	Basketball	1	78.27	24.73	22.27	11762.00	10.91	2.51	2.95	1	5.00	9.00
T_BAS_052	17.07	1	190.0	76.8	R	L	328.26	24.85	25.38	30.72	Basketball	1	111.70	24.23	24.23	21178.00	10.44	2.33	2.90	1	4.00	8.00
T_BAS_053	17.72	1	175.0	67.3	R	L	304.59	27.94	27.56	31.53	Basketball	1	87.94	27.95	10.20	16477.00	10.94	2.48	2.99	1	6.00	6.00
T_BAS_054	17.72	1	180.0	72.0	R	L	282.90	28.98	25.50	27.67	Basketball	1	88.48	27.73	9.87	15154.00	10.55	2.39	2.89	1	8.00	6.00
T_BAS_055	14.91	1	198.0	84.4	R	R	353.21	25.47	28.75	30.43	Basketball	1	109.70	21.45	21.45	16614.00	12.02	2.78	3.24	1	4.00	14.00
T_BAS_056	15.81	1	186.0	89.1	R	R	371.36	22.29	21.66	25.43	Basketball	1	111.80	24.10	18.88	22079.00	11.29	2.57	3.08	1	5.00	10.00
T_BAS_057	18.35	1	192.0	90.6	R	L	418.93	31.01	25.08	30.93	Basketball	1	134.30	24.78	18.55	19917.00	10.91	2.44	3.02	1	7.00	8.00
T_BAS_058	17.22	1	185.0	77.2	R	L	243.62	26.33	28.58	27.97	Basketball	1	104.00	25.01	17.77	16548.00	10.24	2.27	2.85	1	5.00	7.00
T_BAS_060	17.46	1	184.5	83.5	R	L	299.36	31.04	29.06	29.30	Basketball	1	119.60	23.73	19.08	21398.00	10.58	2.39	2.91	1	5.00	10.00
T_BAS_061	16.48	1	172.0	67.3	R	L	246.70	25.15	25.30	28.07	Basketball	1	92.26	21.59	21.59	12933.00	10.51	2.41	2.84	1	5.00	12.00
T_BAS_062	14.91	1	182.0	66.3	L	L	290.45	22.71	24.98	26.54	Basketball	1	89.59	22.98	17.41	12466.00	11.12	2.57	3.00	1	5.00	10.00
T_BAS_064	15.19	1	173.0	56.2	R	L	237.91	21.80	27.12	31.67	Basketball	1	72.87	26.40	9.98	12794.00	10.60	2.40	2.90	1	5.00	10.00
T_BAS_071	19.25	1	201.7	95.3	R	L	421.14	20.23	20.95	19.57	Basketball	1	131.30	22.97	15.91	29152.00	10.75	2.48	2.90	1	8.00	12.00
T_BAS_072	16.56	1	189.0	61.4	L	R	165.34	19.27	22.35	24.47	Basketball	1	82.52	24.33	9.82	12675.00	10.83	2.45	2.97	1	10.00	10.00
T_BAS_073	16.41	1	184.0	68.1	R	L	293.33	18.63	22.94	22.84	Basketball	1	109.10	27.58	18.98	22308.00	10.13	2.30	2.77	1	9.00	8.00
T_BAS_074	16.54	1	201.0	85.7	R	L	348.76	21.34	26.06	30.61	Basketball	1	126.30	27.18	9.81	25604.00	10.13	2.37	2.70	1	10.00	14.00
T_BAS_075	16.58	1	195.0	77.6	R	L	355.80	23.36	22.52	20.83	Basketball	1	122.10	21.75	18.02	17914.00	10.23	2.26	2.85	1	5.00	12.00
T_BAS_076	15.61	1	188.0	72.1	R	L	290.59	23.87	22.30	20.66	Basketball	1	89.67	23.80	15.83	15027.00	9.93	2.23	2.74	1	8.00	10.00
T_BAS_077	16.43	1	186.0	97.3	L	R	450.93	16.21	20.93	20.53	Basketball	1	133.80	25.02	18.91	19654.00	10.79	2.51	2.89	1	9.00	10.00
T_BAS_078	18.35	1	200.0	97.7	R	R	370.58	24.18	24.29	25.39	Basketball	1	138.20	21.36	21.32	31681.00	11.07	2.47	3.07	1	8.00	13.00
T_BAS_079	18.62	1	185.0	87.0	R	L	333.87	31.37	25.39	26.21	Basketball	1	120.60	26.99	9.89	34359.00	11.05	2.57	2.96	1	8.00	8.00
T_BAS_081	18.17	1	172.0	63.5	R	L	244.53	30.08	34.87	35.16	Basketball	1	87.35	24.65	9.87	12947.00	10.96	2.48	3.01	1	4.00	12.00
T_BAS_083	15.45	1	176.5	70.4	R	L	276.44	20.51	24.82	25.09	Basketball	1	89.45	26.43	15.83	19420.00	10.31	2.31	2.84	1	6.00	7.00
T_BAS_085	16.21	1	186.0	86.6	L	R	342.26	24.21	29.64	31.10	Basketball	1	100.30	21.22	18.00	16200.00	10.61	2.45	2.86	1	7.00	9.00
T_BAS_086	18.29	1	174.0	63.5	R	L	279.39	29.64	33.25	32.38	Basketball	1	75.15	26.61	19.14	11598.00	11.02	2.51	3.01	1	6.00	9.00
T_BAS_088	16.97	1	187.0	79.1	R	L	348.17	16.24	18.39	18.80	Basketball	1	104.30	22.75	9.92	21121.00	10.49	2.44	2.81	1	6.00	11.00
T_BAS_093	15.09	1	195.0	89.5	L	R	381.16	18.97	20.15	19.92	Basketball	1	118.80	26.21	21.50	28593.00	10.59	2.46	2.84	1	8.00	6.00
T_BAS_096	17.94	1	204.0	99.0	R	L	384.47	25.54	23.90	22.76	Basketball	1	133.00	23.17	17.77	17321.00	10.83	2.45	2.97	1	7.00	10.00
T_BAS_097	18.48	1	193.0	94.1	L	R	372.68	21.31	20.31	23.23	Basketball	1	123.30	25.49	16.48	20517.00	10.70	2.39	2.96	1	9.00	12.00
T_BAS_098	18.19	1	198.0	104.1	R	L	631.49	20.22	20.38	20.08	Basketball	1	161.10	23.52	14.42	16810.00	11.06	2.51	3.03	1	2.00	13.00
T_BAS_100	19.14	1	196.0	94.3	R	L	361.88	26.96	27.09	28.93	Basketball	1	135.30	30.96	19.20	31413.00	10.25	2.35	2.78	1	12.00	9.00
T_BAS_101	17.58	1	190.0	72.4	R	L	322.63	25.71	27.17	26.00	Basketball	1	116.50	22.97	18.23	43205.00	9.44	2.11	2.61	1	6.00	12.00
T_BAS_102	18.44	1	189.0	74.5	R	L	273.78	29.25	29.09	29.87	Basketball	1	111.90	26.45	18.04	13754.00	10.77	2.43	2.96	1	5.00	10.00
T_BAS_104	16.72	1	195.0	79.5	R	L	197.40	19.81	21.01	22.17	Basketball	1	108.30	22.28	16.66	23130.00	10.61	2.42	2.89	1	2.00	9.00
T_BAS_105	16.69	1	196.0	93.1	R	L	459.07	20.24	21.74	24.99	Basketball	1	116.90	21.44	21.53	11800.00	10.62	2.41	2.90	1	5.00	5.00
T_BAS_106	15.63	1	205.0	111.5	L	R	529.03	19.37	23.26	21.80	Basketball	1	165.40	21.76	16.36	16346.00	10.97	2.42	3.07	1	5.00	14.00
T_BAS_107	17.82	1	193.0	83.2	R	L	312.97	33.63	36.88	41.25	Basketball	1	120.30	26.84	9.85	13501.00	10.27	2.28	2.86	1	5.00	10.00
T_BAS_108	16.76	1	185.0	87.3	R	L	452.71	21.57	25.94	25.47	Basketball	1	123.70	26.86	18.18	20900.00	10.63	2.36	2.96	1	5.00	8.00
T_BAS_110	16.67	1	193.0	127.4	L	R	445.81	22.68	23.16	24.59	Basketball	1	155.00	24.54	9.89	30818.00	11.77	2.71	3.18	1	5.00	10.00
T_BAS_142	15.29	1	195.0	88.6	R	L	376.74	24.30	26.61	26.28	Basketball	1	144.70	23.66	16.09	22483.00	9.77	2.15	2.74	1	5.00	12.00
T_BAS_009	18.47	2	187.0	118.4	R	L	318.94	19.18	20.04	21.91	Basketball	1	123.60	19.44	16.22	12439.00	12.52	2.88	3.39	1	6.00	6.00
T_BAS_011	19.35	2	169.0	59.3	R	L	203.65	22.21	24.47	28.07	Basketball	1	75.71	24.53	17.42	13520.00	10.77	2.43	2.96	1	5.00	13.00
T_BAS_012	19.12	2	181.0	69.3	R	L	273.02	20.44	24.03	26.64	Basketball	1	99.37	23.44	9.87	20804.00	10.82	2.39	3.02	1	6.00	6.00
T_BAS_033	17.60	2	165.0	75.0	R	L	281.44	18.85	22.05	24.38	Basketball	1	88.89	23.04	17.17	12551.00	11.27	2.50	3.14	1	5.00	8.00
T_BAS_034	15.10	2	169.0	61.2	R	L	161.42	23.46	26.09	31.06	Basketball	1	88.80	22.61	16.15	24260.00	11.70	2.58	3.28	1	5.00	9.00
T_BAS_035	15.58	2	178.0	71.7	R	L	254.62	21.06	24.03	27.35	Basketball	1	94.29	22.72	17.29	19540.00	11.69	2.62	3.23	1	3.00	9.00
T_BAS_037	15.21	2	176.0	58.8	R	L	250.63	24.11	23.52	23.84	Basketball	1	84.23	23.76	17.90	10991.00	10.95	2.50	2.98	1	4.00	6.00
T_BAS_039	16.20	2	170.0	70.2	R	L	181.28	27.98	27.55	32.06	Basketball	1	72.22	23.20	10.08	9986.00	11.33	2.59	3.08	1	5.00	14.00
T_BAS_041	14.91	2	175.0	69.8	R	L	276.52	21.04	22.87	26.67	Basketball	1	88.51	25.24	9.78	16900.00	10.86	2.51	2.92	1	5.00	10.00
T_BAS_042	16.28	2	176.0	61.2	R	L	208.21	22.28	24.32	30.04	Basketball	1	84.29	23.61	17.30	14260.00	11.20	2.59	3.01	1	5.00	10.00
T_BAS_043	15.18	2	160.0	72.2	R	L	229.54	19.80	24.41	30.00	Basketball	1	103.80	23.12	16.58	14689.00	11.41	2.64	3.07	1	5.00	7.00
T_BAS_045	14.92	2	188.0	84.9	R	L	236.43	18.57	19.98	21.98	Basketball	1	88.66	20.52	16.67	10472.00	11.92	2.76	3.20	1	5.00	10.00
T_BAS_047	14.87	2	176.0	69.8	R	L	289.79	22.57	26.08	31.79	Basketball	1	92.18	22.38	16.79	13861.00	10.71	2.43	2.93	1	5.00	9.00
T_BAS_066	17.39	2	171.0	64.9	R	L	196.17	23.55	23.12	24.55	Basketball	1	82.54	21.87	9.85	7831.00	11.88	2.73	3.22	1	5.00	10.00
T_BAS_069	17.71	2	181.0	62.0	R	L	280.18	17.82	21.84	23.76	Basketball	1	69.41	19.79	19.79	7128.00	12.05	2.77	3.26	1	5.00	10.00
T_BAS_070	16.59	2	175.0	80.1	R	L	271.60	22.36	24.33	29.39	Basketball	1	112.80	22.38	9.85	16134.00	11.81	2.67	3.24	1	10.00	11.00
T_BAS_089	18.24	2	177.0	65.3	R	L	248.13	23.33	27.24	30.18	Basketball	1	79.97	22.09	19.36	8006.00	11.73	2.66	3.21	1	5.00	10.00
T_BAS_090	19.09	2	176.0	68.5	R	L	281.27	27.70	23.86	27.91	Basketball	1	98.08	24.60	9.68	13862.00	12.30	3.08	3.08	1	5.00	10.00
T_BAS_091	18.71	2	171.0	58.3	R	L	237.46	21.74	22.67	24.48	Basketball	1	64.46	23.69	22.61	10360.00	11.14	2.47	3.11	1	5.00	11.00
T_BAS_094	19.63	2	180.0	97.9	R	L	335.90	24.34	23.98	24.45	Basketball	1	107.20	20.53	14.84	9567.00	12.95	3.07	3.41	1	7.00	10.00
T_BAS_095	18.40	2	175.0	64.8	R	L	238.94	27.66	26.94	27.76	Basketball	1	92.10	24.54	9.82	19186.00	10.94	2.48	2.99	1	5.00	10.00
T_BAS_111	17.99	2	181.0	88.3	R	L	239.21	25.21	24.21	25.08	Basketball	1	101.80	22.30	16.61	11492.00	11.86	2.72	3.22	1	6.00	7.00
T_BAS_113	15.69	2	177.0	74.2	L	R	228.03	25.38	27.02	30.01	Basketball	1	105.10	21.19	9.83	12657.00	11.02	2.45	3.06	1	5.00	10.00
T_BAS_114	15.53	2	180.0	81.5	R	L	267.18	20.31	22.67	22.92	Basketball	1	81.05	22.27	9.86	10428.00	11.26	2.55	3.09	1	5.00	11.00
T_BAS_115	15.06	2	172.0	66.2	L	R	249.02	22.03	24.98	24.79	Basketball	1	88.75	21.38	20.47	7605.00	10.80	2.36	3.04	1	5.00	10.00
T_BAS_116	14.68	2	173.0	64.7	R	L	258.43	29.69	32.22	32.53	Basketball	1	101.70	25.26	18.37	32864.00	10.91	2.50	2.96	1	7.00	7.00
T_BAS_117	17.23	2	173.0	86.4	R	L	243.09	20.74	29.85	30.17	Basketball	1	122.30	23.01	16.38	14648.00	11.00	2.43	3.08	1	5.00	10.00
T_BAS_118	18.24	2	168.0	57.3	R	L	193.88	24.57	29.45	32.88	Basketball	1	74.85	24.65	17.20	10583.00	11.08	2.53	3.01	1	5.00	13.00
T_BAS_165	14.79	2	171.0	59.5	R	L	210.15	24.56	27.81	27.39	Basketball	1	78.66	21.64	15.96	10494.00	11.32	2.58	3.08	1	5.00	10.00
T_BAS_166	15.02	2	167.0	71.6	R	L	141.74	17.39	20.89	25.24	Basketball	1	92.43	24.20	17.76	21509.00	11.50	2.60	3.15	1	5.00	10.00
T_BAS_170	15.41	2	177.0	64.6	R	L	264.12	18.68	23.68	24.64	Basketball	1	94.74	22.99	9.93	13309.00	10.96	2.53	2.96	1	5.00	10.00
T_BAS_171	16.30	2	174.0	71.9	R	L	224.95	18.48	19.92	21.09	Basketball	1	81.22	21.53	16.08	14028.00	11.80	2.62	3.29	1	5.00	10.00
T_BAS_172	15.55	2	173.0	50.8	R	L	173.93	19.80	21.31	22.86	Basketball	1	65.47	21.72	20.67	8885.00	11.38	2.61	3.08	1	5.00	10.00
T_BAS_173	17.28	2	175.0	67.3	R	L	222.57	21.06	22.55	23.37	Basketball	1	98.86	21.23	20.19	17197.00	11.51	2.70	3.06	1	5.00	10.00
T_BAS_176	17.39	2	184.0	72.4	R	L	275.62	19.96	22.33	22.91	Basketball	1	92.35	21.38	16.07	12383.00	11.67	2.67	3.17	1	5.00	10.00
T_BAS_177	16.88	2	170.0	63.4	R	L	142.61	23.02	27.47	29.23	Basketball	1	65.70	25.89	9.88	13014.00	10.85	2.45	2.98	1	6.00	13.00
T_BAS_179	17.38	2	169.0	62.5	R	L	246.72	20.21	20.75	22.85	Basketball	1	83.79	23.84	9.82	13902.00	11.44	2.59	3.13	1	4.00	10.00
T_BAS_180	16.98	2	178.0	74.9	R	L	225.27	22.40	24.55	24.88	Basketball	1	105.70	22.97	9.80	11928.00	11.31	2.59	3.07	1	5.00	10.00
T_BAS_181	17.31	2	175.0	69.2	R	L	238.44	27.33	31.84	33.51	Basketball	1	99.68	24.50	15.51	15156.00	10.92	2.46	3.01	1	7.00	10.00
T_BAS_184	17.32	2	169.0	69.5	R	R	186.60	27.49	25.60	28.14	Basketball	1	91.56	23.97	9.93	13275.00	11.32	2.63	3.04	1	5.00	10.00
T_BAS_185	13.89	2	175.0	76.5	R	L	289.10	22.77	24.61	23.76	Basketball	1	98.82	25.95	9.89	17780.00	10.77	2.44	2.95	1	10.00	9.00
T_TEN_002	14.15	1	172.0	53.1	R	R	211.58	22.09	28.63	29.16	Tenis	5	74.33	22.11	20.41	17078.00	12.26	2.81	3.33	1	7.00	.00
T_TEN_004	16.55	1	186.0	75.9	R	L	402.01	22.25	26.23	26.67	Tenis	5	122.40	23.12	9.78	15521.00	10.80	2.45	2.96	1	12.00	7.00
T_TEN_009	12.05	1	163.0	48.0	R	R	174.71	24.42	25.06	28.14	Tenis	5					11.75	2.63	3.25	1	3.00	10.00
T_TEN_010	12.81	1	163.0	41.1	R	L	102.20	24.16	27.59	30.47	Tenis	5	51.25	22.22	16.92	6193.00	12.01	2.77	3.24	1	6.00	7.00
T_TEN_012	15.07	1	177.0	70.0	R	L	299.04	28.42	28.09	28.81	Tenis	5	98.25	25.50	9.94	27752.00	10.97	2.54	2.95	1	.00	.00
T_TEN_014	13.91	1	180.0	58.6	L	L	208.57	24.24	24.43	26.63	Tenis	5	84.20	22.64	18.65	18260.00	12.27	2.85	3.29	1	6.00	10.00
T_TEN_015	12.50	1	163.0	63.6	R	L	111.82	21.76	26.85	26.67	Tenis	5	67.36	20.30	18.25	6067.00	12.80	2.86	3.54	1	5.00	.00
T_TEN_018	20.67	1	182.5	74.6	L	R	286.21	22.49	22.46	25.21	Tenis	5	121.50	26.55	10.13	17457.00	10.84	2.48	2.94	1	4.00	8.00
T_TEN_019	14.95	1	184.5	72.9	R	L	323.44	23.73	22.89	25.90	Tenis	5	92.71	24.37	9.86	11816.00	10.52	2.47	2.79	1	6.00	11.00
T_TEN_020	18.87	1	183.0	83.2	R	L	306.07	22.94	23.92	24.60	Tenis	5	116.30	26.03	9.74	21290.00	10.62	2.36	2.95	1	1.00	8.00
T_TEN_021	14.94	1	185.0	60.5	R	L	274.83	29.14	27.51	28.57	Tenis	5	75.41	30.42	16.80	27599.00	10.12	2.23	2.84	1	4.00	6.00
T_TEN_022	15.54	1	175.0	66.0	R	L	302.93	28.96	31.10	30.38	Tenis	5	93.41	26.59	23.95	45503.00	9.99	2.25	2.75	1	6.00	13.00
T_TEN_023	15.67	1	185.0	73.5	R	R	373.40	22.40	22.96	25.54	Tenis	5	117.30	25.14	9.94	11679.00	10.43	2.32	2.90	1	5.00	8.00
T_TEN_024	13.50	1	173.0	54.9	R	L	170.06	25.84	28.84	31.66	Tenis	5	73.37	21.91	21.91	11253.00	10.56	2.39	2.90	1	6.00	5.00
T_TEN_028	22.38	1	184.0	78.2	R	L	304.01	21.77	26.60	27.41	Tenis	5	113.60	22.63	11.55	16401.00	10.99	2.49	3.01	1	3.00	6.00
T_TEN_029	14.62	1	185.0	70.5	R	R	268.42	20.93	20.47	20.98	Tenis	5	92.91	20.89	21.13	13328.00	11.06	2.51	3.03	1	8.00	9.00
T_TEN_030	19.46	1	184.0	79.4	R	L	354.78	26.55	26.68	32.46	Tenis	5	122.90	29.79	9.82	35158.00	10.75	2.51	2.87	1	12.00	6.00
T_TEN_031	15.44	1	175.0	56.6	R	L	243.03	27.52	25.09	25.38	Tenis	5	71.36	26.34	9.81	15704.00	10.69	2.53	2.82	1	5.00	8.00
T_TEN_033	25.82	1	177.0	75.0	R	L	210.37	23.15	23.93	23.99	Tenis	5	109.70	29.15	9.85	24314.00	10.17	2.24	2.85	1	2.00	8.00
T_TEN_034	14.56	1	180.0	86.0	R	L	273.37	25.39	27.72	30.91	Tenis	5	102.10	19.66	19.66	12635.00	11.20	2.55	3.05	1	9.00	7.00
T_TEN_035	17.21	1	183.0	72.1	R	L	295.98	26.55	25.19	27.72	Tenis	5	97.63	25.52	9.83	23176.00	10.54	2.39	2.89	1	5.00	9.00
T_TEN_041	14.99	1	175.0	58.8	R	L	232.16	22.65	22.99	25.07	Tenis	5	59.39	22.91	9.71	9789.00	11.76	2.68	3.20	1	5.00	6.00
T_TEN_042	12.86	1	170.0	55.4	L	L	206.22	20.13	21.07	23.05	Tenis	5	70.85	23.12	9.86	12961.00	11.46	2.60	3.13	1	9.00	6.00
T_TEN_043	17.23	1	178.0	76.4	R	L	227.25	27.67	28.21	28.59	Tenis	5	126.40	25.43	9.85	17368.00	10.80	2.47	2.94	1	5.00	6.00
T_TEN_044	15.92	1	180.0	67.5	R	L	257.86	23.24	25.23	28.50	Tenis	5	91.60	27.00	9.87	23517.00	10.74	2.43	2.94	1	8.00	4.00
T_TEN_045	15.09	1	186.0	73.6	R	L	271.27	35.98	32.95	29.69	Tenis	5	103.90	24.16	9.87	13166.00	10.47	2.36	2.88	1	6.00	8.00
T_TEN_047	13.76	1	173.0	65.4	R	L	192.55	23.58	28.37	31.49	Tenis	5	74.52	21.24	21.53	8619.00	11.34	2.65	3.03	1	6.00	8.00
T_TEN_048	12.60	1	172.0	54.4	R	L	206.17	22.96	24.48	26.72	Tenis	5	66.64	22.03	9.91	18557.00	10.61	2.43	2.88	1	6.00	9.00
T_TEN_049	14.00	1	178.0	53.8	R	L	193.25	22.13	25.66	27.86	Tenis	5	74.72	21.18	9.88	8215.00	11.01	2.44	3.07	1	6.00	8.00
T_TEN_050	15.39	1	157.0	58.2	R	L	223.10	30.27	28.53	28.86	Tenis	5	73.16	22.36	9.76	8404.00	11.44	2.61	3.11	1	8.00	6.00
T_TEN_052	15.86	1	175.0	63.1	R	R	246.27	20.24	24.53	24.53	Tenis	5	77.73	27.35	9.84	15341.00	10.34	2.32	2.86	1	4.00	8.00
T_TEN_053	22.94	1	186.0	88.2	R	L	323.67	29.23	26.34	23.03	Tenis	5	134.70	25.19	22.27	15966.00	10.18	2.30	2.79	1	2.00	6.00
T_TEN_057	13.69	1	173.0	59.4	R	R	162.49	22.05	29.42	30.11	Tenis	5	83.90	24.88	9.80	19909.00	10.69	2.45	2.90	1	5.00	7.00
T_TEN_058	13.41	1	174.0	65.0	R	L	256.67	28.12	26.50	26.40	Tenis	5	103.50	28.85	9.76	23553.00	10.67	2.39	2.95	1	5.00	10.00
T_TEN_060	15.54	1	175.0	61.9	R	L	218.54	27.43	25.32	30.77	Tenis	5	94.07	25.83	9.84	13725.00	10.19	2.29	2.81	1	3.00	10.00
T_TEN_061	20.55	1	174.0	62.9	R	L	259.96	25.37	23.83	26.48	Tenis	5	99.01	28.32	9.75	13976.00	10.39	2.41	2.79	1	11.00	4.00
T_TEN_066	14.68	1	178.0	62.4	R	R	279.58	22.94	24.06	28.97	Tenis	5	87.96	20.65	20.65	15219.00	10.74	2.40	2.98	1	4.00	6.00
T_TEN_068	28.60	1	182.0	84.6	R	L	354.53	28.06	27.63	26.83	Tenis	5	135.20	27.38	9.85	25292.00	10.75	2.96	2.42	1	4.00	19.00
T_TEN_070	20.31	1	182.0	70.2	R	R	319.72	21.02	25.40	30.66	Tenis	5	100.60	25.52	9.82	15053.00	10.76	2.47	2.91	1	4.00	11.00
T_TEN_071	15.51	1	181.0	63.7	R	L	234.26	27.73	25.88	29.47	Tenis	5	86.56	25.00	22.58	19247.00	11.01	2.51	2.99	1	14.00	7.00
T_TEN_073	16.24	1	187.0	79.1	R	L	363.12	17.76	21.89	24.87	Tenis	5	115.90	23.23	23.27	20513.00	10.68	2.45	2.89	1	8.00	7.00
T_TEN_076	15.75	1	191.0	79.0	R	L	323.56	20.68	22.05	23.66	Tenis	5	102.00	24.26	9.85	19281.00	10.70	2.40	2.95	1	11.00	6.00
T_TEN_081	17.20	1	186.0	74.0	R	L	287.33	23.99	24.49	29.04	Tenis	5	117.30	23.33	9.78	19922.00	10.73	2.43	2.94	1	10.00	5.00
T_TEN_085	15.75	1	198.0	88.0	R	L	343.64	26.74	27.51	28.15	Tenis	5	126.30	24.40	9.85	26692.00	10.89	2.46	2.99	1	13.00	3.00
T_TEN_086	15.63	1	176.0	65.5	L	L	193.98	22.19	25.49	29.65	Tenis	5	99.21	25.86	9.82	15746.00	10.71	2.44	2.92	1	11.00	6.00
T_TEN_087	13.68	1	178.0	57.0	R	L	236.80	20.76	23.52	24.89	Tenis	5	83.79	25.79	9.83	14871.00	10.73	2.44	2.93	1	8.00	8.00
T_TEN_090	17.99	1	185.0	73.9	R	R	309.12	27.83	27.48	29.17	Tenis	5	93.79	22.51	20.76	10704.00	10.57	2.38	2.91	1	7.00	6.00
T_TEN_094	21.17	1	183.0	80.7	R	R	346.65	31.20	24.04	25.88	Tenis	5	103.20	24.57	9.79	11540.00	10.57	2.40	2.89	1	10.00	6.00
T_TEN_101	16.26	1	180.0	75.2	R	R	327.45	29.17	25.88	29.31	Tenis	5	99.70	26.26	9.81	18705.00	9.99	2.24	2.76	1	10.00	11.00
T_TEN_102	21.03	1	180.0	81.5	R	L	239.70	24.10	25.50	27.06	Tenis	5	124.20	27.93	9.85	20906.00	10.39	2.33	2.87	1	2.00	11.00
T_TEN_105	20.38	1	173.0	76.3	R	R	300.18	24.80	23.16	23.65	Tenis	5	111.50	27.20	9.80	20274.00	11.08	2.47	3.08	1	4.00	10.00
T_TEN_108	14.34	1	156.0	49.8	R	R	197.24	24.46	28.70	31.41	Tenis	5	57.82	22.21	19.75	12607.00	11.10	2.51	3.04	1	6.00	5.00
T_TEN_110	17.56	1	178.0	82.1	R	L	357.87	23.95	25.17	25.46	Tenis	5	120.80	28.30	9.85	26448.00	9.95	2.24	2.74	1	7.00	7.00
T_TEN_003	13.84	2	170.0	62.0	R	L	216.58	23.51	25.72	25.64	Tenis	5	79.72	22.06	9.81	8387.00	11.90	2.68	3.27	1	6.00	8.00
T_TEN_007	14.56	2	168.0	56.5	R	L	221.60	24.62	26.32	30.94	Tenis	5	80.86	23.51	20.31	13436.00	12.01	2.70	3.30	1	5.00	8.00
T_TEN_008	12.54	2	173.0	56.0	R	R	186.82	18.72	21.57	23.61	Tenis	5	70.48	21.84	9.70	13237.00	12.38	2.83	3.37	1	7.00	9.00
T_TEN_013	21.13	2	167.0	71.9	R	L	252.51	25.13	23.81	24.68	Tenis	5	90.35	24.78	9.83	14315.00	12.17	2.71	3.38	1	6.00	5.00
T_TEN_016	20.36	2	172.0	66.4	R	L	236.55	17.05	17.93	19.00	Tenis	5	70.52	20.65	20.02	8711.00	11.92	2.71	3.26	1	6.00	9.00
T_TEN_017	16.74	2	173.0	68.3	R	L	247.48	17.69	19.09	19.34	Tenis	5	77.73	25.89	9.84	21977.00	11.01	2.51	3.00	1	5.00	8.00
T_TEN_026	12.54	2	165.0	52.4	L	R	181.38	19.99	22.41	25.63	Tenis	5	54.87	22.05	13.55	9892.00	12.34	2.76	3.41	1	8.00	10.00
T_TEN_027	13.84	2	165.0	51.5	R	L	115.25	19.94	23.18	25.03	Tenis	5	62.88	20.50	20.06	7214.00	11.34	2.55	3.12	1	7.00	10.00
T_TEN_037	22.26	2	163.0	57.3	R	L	150.82	27.94	28.95	30.54	Tenis	5	77.62	25.91	9.90	15657.00	11.79	2.69	3.21	1	1.00	7.00
T_TEN_038	22.41	2	183.0	72.5	R	R	285.36	24.75	22.68	23.43	Tenis	5	85.13	22.36	9.81	11792.00	11.58	2.67	3.13	1	4.00	7.00
T_TEN_039	16.19	2	180.0	63.6	R	L	252.90	26.86	28.97	29.97	Tenis	5	77.63	25.07	9.80	14109.00	11.36	2.60	3.08	1	8.00	11.00
T_TEN_040	16.92	2	163.0	60.4	R	R	185.40	21.15	27.83	27.41	Tenis	5	79.21	23.24	9.80	15522.00	11.77	2.68	3.21	1	16.00	6.00
T_TEN_046	15.06	2	170.0	71.4	R	L	251.67	20.58	25.38	30.62	Tenis	5	96.42	21.06	21.57	16242.00	11.93	2.70	3.26	1	5.00	11.00
T_TEN_051	12.81	2	168.0	57.1	R	R	181.30	25.07	23.22	25.09	Tenis	5	75.27	28.45	9.81	23481.00	11.36	2.57	3.11	1	6.00	9.00
T_TEN_054	18.18	2	171.0	75.1	R	R	250.83	22.46	25.24	26.56	Tenis	5	115.20	27.50	9.83	18326.00	11.42	2.61	3.10	1	6.00	15.00
T_TEN_055	14.25	2	171.0	58.1	R	L	156.44	22.03	24.89	25.46	Tenis	5	71.72	23.10	9.88	17639.00	11.59	2.57	3.23	1	6.00	7.00
T_TEN_056	14.93	2	162.0	56.6	R	L	241.57	23.45	24.95	30.14	Tenis	5	78.65	25.57	9.80	19356.00	11.61	2.67	3.14	1	6.00	6.00
T_TEN_059	17.22	2	166.0	56.5	R	L	162.36	19.55	21.19	23.47	Tenis	5	66.81	21.08	21.07	8869.00	12.17	2.77	3.32	1	5.00	6.00
T_TEN_062	14.72	2	166.0	59.6	R	R	193.94	21.10	20.89	22.51	Tenis	5	77.78	22.07	22.07	10012.00	11.48	2.60	3.14	1	8.00	7.00
T_TEN_063	14.31	2	167.0	54.9	R	L	202.20	22.90	26.25	28.89	Tenis	5	71.51	23.20	9.84	8687.00	11.37	2.58	3.11	1	5.00	8.00
T_TEN_064	16.60	2	169.0	63.1	R	L	177.74	18.28	25.36	29.83	Tenis	5	76.81	23.06	9.84	14917.00	11.72	2.64	3.22	1	5.00	7.00
T_TEN_065	19.04	2	170.0	70.3	R	L	173.53	20.97	20.80	23.23	Tenis	5	106.80	23.22	9.83	14707.00	11.22	2.52	3.09	1	8.00	7.00
T_TEN_067	19.20	2	171.0	63.1	R	R	201.05	20.48	20.98	21.07	Tenis	5	65.27	24.72	9.80	15395.00	12.27	2.81	3.33	1	1.00	12.00
T_TEN_069	15.98	2	175.0	64.2	R	L	280.40	24.22	25.02	28.69	Tenis	5	97.98	26.86	9.75	24177.00	11.23	2.51	3.11	1	6.00	8.00
T_TEN_074	15.66	2	179.0	72.5	L	R	220.10	23.21	22.65	25.63	Tenis	5	97.30	22.27	9.86	14366.00	12.23	2.79	3.33	1	11.00	6.00
T_TEN_077	18.07	2	166.0	58.7	R	L	236.57	25.43	25.67	29.19	Tenis	5	71.35	26.45	9.78	12197.00	11.80	2.82	3.08	1	8.00	14.00
T_TEN_080	17.42	2	182.0	73.0	R	L	240.55	20.18	22.04	24.68	Tenis	5	101.10	21.95	9.79	14876.00	11.96	2.76	3.23	1	5.00	8.00
T_TEN_082	16.69	2	175.0	68.8	R	L	190.33	20.19	21.25	23.21	Tenis	5	104.40	22.21	9.77	15552.00	12.39	2.83	3.37	1	6.00	9.00
T_TEN_083	13.73	2	165.0	48.8	R	L	180.94	21.33	22.75	21.64	Tenis	5	61.47	26.27	9.73	9724.00	11.78	2.69	3.20	1	5.00	7.00
T_TEN_089	18.43	2	178.0	68.8	L	L	252.21	22.19	23.36	29.69	Tenis	5	87.03	26.75	9.97	18129.00	11.38	2.63	3.07	1	12.00	6.00
T_TEN_091	15.56	2	173.0	57.2	R	L	213.66	22.24	23.19	26.45	Tenis	5	83.22	23.04	9.78	11384.00	11.15	2.50	3.08	1	10.00	6.00
T_TEN_092	17.23	2	169.0	71.3	R	L	210.12	23.88	26.91	28.77	Tenis	5	84.03	24.58	9.80	13352.00	11.95	2.76	3.22	1	12.00	6.00
T_TEN_100	13.80	2	169.0	57.1	R	R	157.04	23.13	25.68	28.06	Tenis	5	66.81	20.37	20.37	10823.00	11.90	2.75	3.21	1	5.00	7.00
T_TEN_103	19.32	2	165.0	67.8	R	R	220.03	20.53	22.14	27.94	Tenis	5	76.91	24.05	9.76	11060.00	10.98	2.41	3.08	1	4.00	9.00
T_TEN_104	16.79	2	160.0	50.2	R	R	231.26	23.14	25.67	25.79	Tenis	5	69.46	24.86	9.77	16702.00	12.30	2.84	3.32	1	4.00	12.00
T_TEN_109	15.10	2	172.0	58.7	R	L	199.70	23.74	25.92	28.68	Tenis	5	87.04	24.73	9.86	16870.00	10.74	2.38	2.99	1	18.00	5.00

## Sheet: List1
Code
Surname
Name
Age				Code	Surname	Name	Age	Gender	BodyHeight	BodyMass	Dom_Arm	Dom_Leg	Nordic_MVC_both	B05_ECC_MAX_both	B125_ECC_MAX_both	B2_ECC_MAX_both	Identifier	Identifier2	CMJ_Dec_Phase_FI	CMJ_F_PeakECC_stand	CMJ_F_PeakECC_P3	CMJ_Max_ECC_RFD_Stand	Agility_general	Agility90	Agility180	filter_$	Training_years	Weekly_sess
Gender
BodyHeight
BodyMass
Dom_Arm
Dom_Leg
Nordic_MVC_both
B05_ECC_MAX_both
B125_ECC_MAX_both
B2_ECC_MAX_both
Identifier
Identifier2
CMJ_Dec_Phase_FI
CMJ_F_PeakECC_stand
CMJ_F_PeakECC_P3
CMJ_Max_ECC_RFD_Stand
Agility_general
Agility90
Agility180
filter_$
Training_years
Weekly_sess
